# Supplementary material
Source: Springer Nature journal article supplement (http://www.springermedizin.de/resource/supplementary/13102_2009_17_MOESM5_ESM.pdf/9667560)

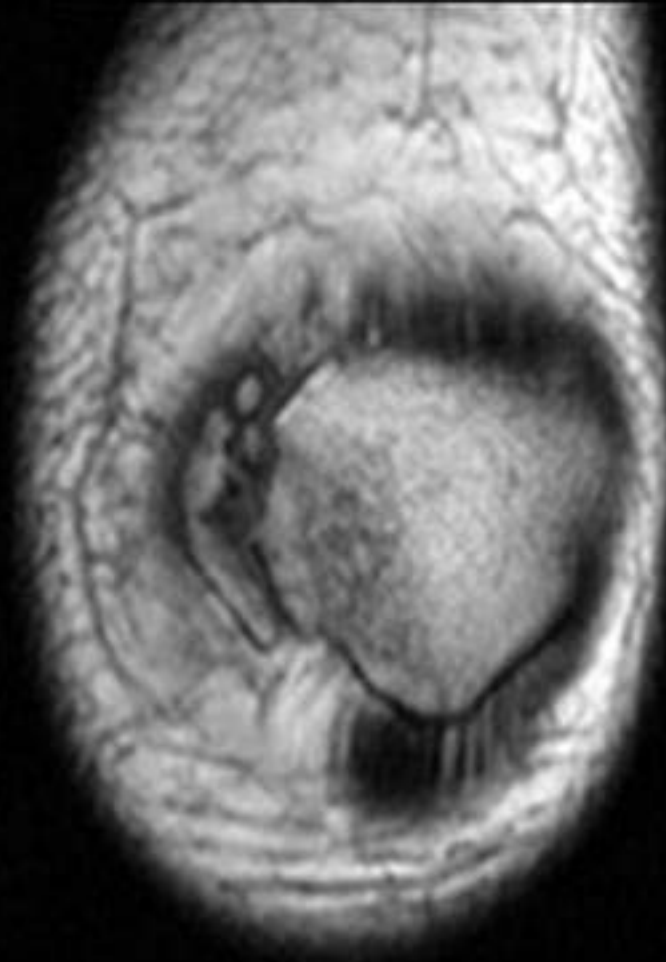

Supplement: MOESM5 [file 9667560]
